# Supplementary material for: Platelets as autonomous drones for hemostatic and immune surveillance
Source: PubMed Central journal article supplement — J Exp Med. 2017 Aug 7;214(8):2193–204. doi: 10.1084/jem.20170879 (PMC5551582; doi:10.1084/jem.20170879), 2017-08-07
Supplement: JEM_20170879_sm.pdf [file JEM_20170879_sm.pdf]

SUPPLEMENTAL MATERIAL

Li et al., <https://doi.org/10.1084/jem.20170879>

Table S1. Partial list of human platelet receptors and their ligands

| Receptor                                                                       | Example ligands                                                                                           | Proposed involvement |          |
|--------------------------------------------------------------------------------|-----------------------------------------------------------------------------------------------------------|----------------------|----------|
|                                                                                |                                                                                                           | Hemostasis           | Immunity |
| <b>Pattern recognition receptors</b>                                           |                                                                                                           |                      |          |
| CD36                                                                           | TSP1, oxidized phospholipids, lipopeptides, lipoproteins, long chain fatty acids                          | x                    | x        |
| NOD2                                                                           | Muramyl dipeptide                                                                                         |                      | x        |
| SRB1                                                                           | Phospholipids, cholesterol ester, lipoproteins, phosphatidylserine                                        | x                    | x        |
| TLR1 (CD281)                                                                   | Lipopeptides                                                                                              |                      | x        |
| TLR2 (CD282)                                                                   | Glycolipids, lipoproteins, HSP70, zymosan, lipotechoic acid                                               |                      | x        |
| TLR3 (CD283)                                                                   | dsRNA, poly I:C                                                                                           |                      | x        |
| TLR4 (CD284)                                                                   | LPS, heat shock proteins, HMGB1, fibrinogen, heparan sulfate fragments, hyaluronic acid fragments, nickel |                      | x        |
| TLR6 (CD286)                                                                   | Lipopeptides                                                                                              |                      | x        |
| TLR7                                                                           | ssRNA                                                                                                     |                      | x        |
| TLR9 (CD289)                                                                   | Unmethylated CpG                                                                                          |                      | x        |
| <b>Antigen receptors/presentation/<br/>co-stimulation/complement receptors</b> |                                                                                                           |                      |          |
| CD40L (CD154)                                                                  | CD40                                                                                                      |                      | x        |
| C1qR <sub>p</sub> (CD93)                                                       | C1q? (exact ligands unclear)                                                                              |                      | x        |
| C3aR                                                                           | C3a                                                                                                       |                      | x        |
| C5aR (CD88)                                                                    | C5a                                                                                                       |                      | x        |
| Fc $\alpha$ RI (CD89)                                                          | IgA                                                                                                       |                      | x        |
| Fc $\epsilon$ RI (CD23)                                                        | IgE                                                                                                       |                      | x        |
| Fc $\gamma$ RIIIa (CD32)                                                       | IgG                                                                                                       |                      | x        |
| MHC class I                                                                    | CD4                                                                                                       |                      | x        |
| <b>Chemokine receptors</b>                                                     |                                                                                                           |                      |          |
| CCR1 (CD191)                                                                   | CCL3, CCL5, CCL7, CCL15                                                                                   |                      | x        |
| CCR3 (CD193)                                                                   | CCL5, CCL7, CCL11, CCL13, CCL26                                                                           |                      | x        |
| CCR4 (CD194)                                                                   | CCL2, CCL3, CCL4, CCL5, CCL17                                                                             |                      | x        |
| CXCR4 (CD184)                                                                  | CXCL12                                                                                                    |                      | x        |
| CX3CR1                                                                         | CX3CL1                                                                                                    |                      | x        |
| <b>Sialic acid-binding receptors</b>                                           |                                                                                                           |                      |          |
| Siglec-7                                                                       | $\alpha$ 2,8-linkage, $\alpha$ 2,6-linkage, $\alpha$ 2,3-linkage                                          |                      | x        |
| Siglec-9                                                                       | $\alpha$ 2,3-linkage, $\alpha$ 2,6-linkage                                                                |                      | x        |
| Siglec-11                                                                      | $\alpha$ 2,8-linkage                                                                                      |                      | x        |
| <b>Adhesion molecules and ligands</b>                                          |                                                                                                           |                      |          |
| $\alpha$ <sub>2</sub> $\beta$ <sub>1</sub> /GPIIb-IIIa/VLA-2 (CD49b/CD29)      | Collagen                                                                                                  | x                    |          |
| $\alpha$ <sub>2b</sub> $\beta$ <sub>2</sub> /GPIIb-IIIa (CD41/CD61)            | Fibrinogen, fibrin, VWF, fibronectin, vitronectin, thrombospondin                                         | x                    |          |
| $\alpha$ <sub>5</sub> $\beta$ <sub>1</sub> /VLA-5 (CD49e/CD29)                 | Fibronectin                                                                                               | x                    |          |
| $\alpha$ <sub>6</sub> $\beta$ <sub>1</sub> /VLA-6 (CD49f/CD29)                 | Laminin                                                                                                   | x                    |          |
| $\alpha$ <sub>v</sub> $\beta$ <sub>3</sub> (CD51/CD61)                         | Vitronectin, fibronectin, VWF, prothrombin, thrombospondin, osteopontin                                   | x                    |          |
| GPIIb-IX-V (CD42)                                                              | VWF, P-selectin, $\alpha$ <sub>v</sub> $\beta$ <sub>2</sub> , factor XII, XI, thrombin, C3                | x                    |          |
| ICAM-2 (CD102)                                                                 | $\alpha$ <sub>v</sub> $\beta$ <sub>2</sub> /LFA-1 (CD11a/CD18)                                            |                      | x        |
| JAM-C/JAM-3                                                                    | Fc $\gamma$ RIIIa, $\alpha$ <sub>v</sub> $\beta$ <sub>2</sub> /Mac-1 (CD11b/CD18)                         | x                    | x        |
| P-selectin (CD62P)                                                             | PSGL-1, GPIIb, tissue factor, C3b                                                                         | x                    | x        |
| PECAM-1 (CD31)                                                                 | PECAM-1, collagen, glycosaminoglycans, $\alpha$ <sub>v</sub> $\beta$ <sub>3</sub>                         | x                    | x        |
| <b>Thrombosis-regulatory receptors</b>                                         |                                                                                                           |                      |          |
| CLEC-2                                                                         | Podoplanin, rhodocytin                                                                                    | x                    |          |
| Tissue factor/factor III (CD142) (?)                                           | Factor VIIa                                                                                               | x                    |          |
| GPVI                                                                           | Collagen                                                                                                  | x                    |          |
| PAR-1                                                                          | Thrombin                                                                                                  | x                    |          |
| PAR-4                                                                          | Thrombin                                                                                                  | x                    |          |
| SLAM/SLAMF1 (CD150)                                                            | Other SLAM family members, measles virus, OmpC, OmpF                                                      | x                    | x        |
| SLAMF5 (CD84)                                                                  | SLAM family members                                                                                       | x                    |          |
| TLT-1                                                                          | Fc $\epsilon$ RI? (physiological ligands unclear)                                                         | x                    | x        |
| <b>Purinergic and eicosanoid receptors</b>                                     |                                                                                                           |                      |          |
| A2a (P1 type)                                                                  | Adenosine                                                                                                 | x                    | x        |
| P <sub>2</sub> X1                                                              | ATP                                                                                                       | x                    | x        |
| P <sub>2</sub> Y1                                                              | ADP                                                                                                       | x                    | x        |
| P <sub>2</sub> Y12                                                             | ADP                                                                                                       | x                    | x        |
| EP <sub>3</sub>                                                                | PGE <sub>2</sub>                                                                                          | x                    | x        |
| IP                                                                             | PGI <sub>2</sub>                                                                                          | x                    | ?        |
| TP                                                                             | TXA <sub>2</sub> , PGH <sub>2</sub>                                                                       | x                    | x        |

Table S1. **Partial list of human platelet receptors and their ligands** (*Continued*)

| Receptor                               | Example ligands   | Proposed involvement |          |
|----------------------------------------|-------------------|----------------------|----------|
|                                        |                   | Hemostasis           | Immunity |
| <b>Hormone and metabolic receptors</b> |                   |                      |          |
| 5-HT <sub>2A</sub>                     | Serotonin         | x                    | x        |
| Arginine vasopressin receptors         | Vasopressin       | x                    | ?        |
| c-mpl (CD110)                          | Thrombopoietin    | ?                    | ?        |
| Dopamine receptors                     | Dopamine          | ?                    | ?        |
| Insulin receptor (CD220)               | Insulin           | ?                    | ?        |
| Leptin receptor (CD295)                | Leptin            | ?                    | ?        |
| PDGF-R $\alpha$                        | PDGF              | ?                    | ?        |
| Platelet-activating factor receptor    | Oxidized LDL, PAF | ?                    | x        |
| Tie-1                                  | Angiopoietin      | ?                    | ?        |
| $\beta_2$ adrenergic receptor          | Epinephrine       | x                    | ?        |
